# Supplementary material for: The Response to Inoculation with PGPR Plus Orange Peel Amendment on Soybean Is Cultivar and Environment Dependent
Source: MDPI journal article supplement (doi:10.3390/plants11091138), 2022-04-22
Supplement: s1 [file s1]

**Supplementary Table S1.** Characteristics of the soybean cultivars tested in the preliminary greenhouse experiment.

| <b>Cultivar</b> | <b>Brand/Company</b> | <b>Maturity Group</b> | <b>Trait</b>          |
|-----------------|----------------------|-----------------------|-----------------------|
| AG44X0          | Asgrow               | 4.4                   | R2X <sup>1</sup>      |
| AG53X0          | Asgrow               | 5.3                   | R2X                   |
| AG69X0          | Asgrow               | 6.9                   | R2X                   |
| CZ 4539GTLL     | Credenz              | 4.5                   | GTLL <sup>2</sup>     |
| CZ 5859LL       | Credenz              | 5.8                   | LL <sup>3</sup>       |
| CZ 6515LL       | Credenz              | 6.5                   | LL                    |
| G4190RX         | Agrigold             | 4.1                   | R2X, STS <sup>4</sup> |
| G5000RX         | Agrigold             | 5.0                   | R2X, STS              |
| GoSoy 512E18    | Stratton Seed Co.    | 5.1                   | Enlist <sup>5</sup>   |
| LS4798X         | Local Seed Co.       | 4.7                   | R2X                   |
| LS5087X         | Local Seed Co.       | 5.0                   | R2X                   |
| LS5588X         | Local Seed Co.       | 5.5                   | R2X                   |
| LSX6501XS       | Local Seed Co.       | 6.5                   | R2X, STS              |
| S49-F5X         | NK Seeds             | 4.9                   | R2X                   |
| REV 4940X       | REV Brand Seeds      | 4.9                   | R2X                   |
| REV 5659X       | REV Brand Seeds      | 5.6                   | R2X                   |
| S49XT39         | Dyna-Gro             | 4.9                   | R2X                   |
| S52XT08         | Dyna-Gro             | 5.2                   | R2X                   |
| S54XT17         | Dyna-Gro             | 5.4                   | R2X                   |
| S56XT99         | Dyna-Gro             | 5.6                   | R2X                   |

<sup>1</sup>Roundup Ready 2 Xtend® (R2X)

<sup>2</sup>LibertLink® GT27® (GTLL)

<sup>3</sup>LibertLink® (LL)

<sup>4</sup>Sulfonylurea Tolerant Soybean (STS®)

<sup>5</sup>Enlist E3® (Enlist)

**Supplementary Table S2.** Author, publication year, soybean shoot B values (used to calculate the proportion of nitrogen derived from the air), and maturity stage retrieved from literature for soybean grown in the greenhouse experiments.

| <b>Author</b>      | <b>Publication year</b> | <b>Shoot B value %</b> | <b>Stage</b> |
|--------------------|-------------------------|------------------------|--------------|
| Amarger            | 1979                    | -1.2                   | R4-R5        |
| Amarger            | 1979                    | -1.5                   | R4-R5        |
| Amarger            | 1979                    | -1.6                   | R4-R5        |
| Amarger            | 1979                    | -1.3                   | R4-R5        |
| Bergersen et al.   | 1985                    | -1.36                  | R3-R5        |
| Bergersen et al.   | 1985                    | -1.3                   | R4-R5        |
| Bergersen et al.   | 1985                    | -1.4                   | R4-R5        |
| Schipanski et al.  | 2010                    | -2.28                  | R4           |
| Schipanski et al.  | 2010                    | -2.7                   | R4           |
| Balboa & Ciampitti | 2020                    | -2.37                  | R3           |
| Balboa & Ciampitti | 2020                    | -2.32                  | R5           |
| Balboa & Ciampitti | 2020                    | -2.05                  | R3           |
| Balboa & Ciampitti | 2020                    | -1.97                  | R5           |
| Balboa & Ciampitti | 2020                    | -1.96                  | R3           |
| Balboa & Ciampitti | 2020                    | -2                     | R5           |
| Balboa & Ciampitti | 2020                    | -2.18                  | R3           |
| Balboa & Ciampitti | 2020                    | -2.2                   | R5           |
| <b>Average</b>     |                         | <b>-1.86</b>           |              |

**Supplementary Table S3.** Author, publication year, soybean shoot B values (used to calculate the proportion of nitrogen derived from the air), and maturity stage retrieved from literature for soybean cultivated in field conditions.

| <b>Author</b>  | <b>Publication year</b> | <b>Shoot B value %</b> | <b>Stage</b> |
|----------------|-------------------------|------------------------|--------------|
| Araujo et al.  | 2018                    | -2.85                  | R1           |
| Araujo et al.  | 2018                    | -3.17                  | R1           |
| Araujo et al.  | 2018                    | -2.76                  | R1           |
| Araujo et al.  | 2018                    | -2.35                  | R2           |
| <b>Average</b> |                         | <b>-2.78</b>           |              |
